# Supplementary material for: Social Mating System and Sex-Biased Dispersal in Mammals and Birds: A Phylogenetic Analysis
Source: PubMed Central journal article supplement (PMC3590276; doi:10.1371/journal.pone.0057980), 2013-03-06
Supplement: pone.0057980.s001.pdf [file pone.0057980.s001.pdf]

Table S1: mating system and dispersal data for mammals.

| taxonomy     | Latin name                                 | common name       | social mating system | male dispersal distance (m)      | female dispersal distance (m)    | dispersal sex-bias | sources                                                                              |
|--------------|--------------------------------------------|-------------------|----------------------|----------------------------------|----------------------------------|--------------------|--------------------------------------------------------------------------------------|
| Artiodactyla |                                            |                   |                      |                                  |                                  |                    |                                                                                      |
| Cervidae     | <i>Odocoileus hemionus</i>                 | mule deer         | non-monogamy         | 15,200                           | 12,200                           | male               | Anderson & Wallmo 1984; Bunnell & Harestad 1983                                      |
|              | <i>Odocoileus virginianus</i> <sup>^</sup> | white-tailed deer | non-monogamy         | 18,500;<br>12,900*               | 19,500;<br>8,200*                | -                  | Dusek et al. 1989                                                                    |
| Carnivora    |                                            |                   |                      |                                  |                                  |                    |                                                                                      |
| Canidae      | <i>Canis latrans</i>                       | coyote            | monogamy             | 42,016*;<br>176,000 <sup>#</sup> | 42,250*;<br>232,200 <sup>#</sup> | female             | Andrews & Boggess 1978; Bekoff, 1977, Bowen 1982; Harrison 1992; Roy & Dorrance 1985 |
|              | <i>Canis lupus</i>                         | wolf              | monogamy             | 154,000                          | 123,000                          | male               | Ballard et al. 1997; Gese & Mech 1991                                                |
|              | <i>Lycaon pictus</i>                       | African wild dog  | non-monogamy         | 40,700*                          | 19,000*                          | male               | McNutt 1996; Nowak 1991                                                              |
|              | <i>Urocyon cinereoargenteus</i>            | grey fox          | monogamy             | 16,000*                          | 5,200*                           | male               | Fritzelle & Haroldson 1982; Tullar & Berchielli 1982                                 |
|              | <i>Vulpes vulpes</i>                       | red fox           | monogamy             | 29,002*                          | 13,708*                          | male               | Jensen 1973; Storm et al. 1976; Tullar & Berchielli 1980                             |
| Felidae      | <i>Lynx lynx</i>                           | northern lynx     | non-monogamy         | 60,250                           | 7,000                            | male               | Nowak 1991; Schmidt 1998                                                             |
|              | <i>Puma concolor</i>                       | cougar            | non-monogamy         | 37,300                           | 11,300                           | male               | Currier 1983; Maehr et al. 2002                                                      |
| Herpestidae  | <i>Helogale parvula</i>                    | dwarf mongoose    | monogamy             | 250*                             | 750*                             | female             | Nowak 1991; Rood 1987                                                                |

|                 |                                       |                         |              |                                                         |                                                       |                           |                                                                                  |
|-----------------|---------------------------------------|-------------------------|--------------|---------------------------------------------------------|-------------------------------------------------------|---------------------------|----------------------------------------------------------------------------------|
| Mustelidae      | <i>Gulo gulo</i>                      | wolverine               | non-monogamy | 51,000                                                  | 60,000                                                | female                    | Vangen et al. 2001; Wilson 1982                                                  |
|                 | <i>Martes pennant</i> <sup>^</sup>    | fisher                  | non-monogamy | 10,800;<br>10,700 <sup>*</sup>                          | 11,200;<br>10,000 <sup>*</sup>                        | -                         | Arthur et al. 1993; Nowak 1991                                                   |
|                 | <i>Mephitis mephitis</i> <sup>^</sup> | striped skunk           | non-monogamy | 3,000                                                   | 2,900                                                 | male                      | Nowak 1991; Rosatte & Gunson 1984                                                |
|                 | <i>Mustela erminea</i>                | ermine                  | non-monogamy | 1,986 <sup>*</sup> ;<br>5,600 <sup>#</sup>              | 754 <sup>*</sup> ; 1,000 <sup>#</sup>                 | male                      | Erlinge 1977; King 1983                                                          |
|                 | <i>Mustela putorius</i>               | ferret                  | non-monogamy | 6,700                                                   | 11,800                                                | female                    | Byrom 2002; Nowak 1991                                                           |
|                 | <i>Mustela vison</i>                  | mink                    | non-monogamy | 18,024                                                  | 26,553                                                | female                    | Mitchell 1961; Nowak 1991                                                        |
|                 | <i>Taxidea taxus</i>                  | North American badger   | non-monogamy | 11,000 <sup>*</sup> ;<br>110,000 <sup>#</sup>           | 13,500 <sup>*</sup> ;<br>52,000 <sup>#</sup>          | female (based on medians) | Lindzey 1978; Long 1973; Messick & Hornocker 1981                                |
| Procyonidae     | <i>Procyon lotor</i>                  | raccoon                 | non-monogamy | 9,700;<br>14,400 <sup>*</sup>                           | 600; 10,900 <sup>*</sup>                              | male                      | Gehrt & Fritzell 1998; Stuewer 1943                                              |
| Ursidae         | <i>Ursus americanus</i>               | American black bear     | non-monogamy | 61,000;<br>49,000 <sup>*</sup>                          | 7,333;<br>8,000 <sup>*</sup>                          | male                      | Larivière 2001; Rogers 1987                                                      |
|                 | <i>Ursus arctos</i>                   | grizzly bear            | non-monogamy | 29,900;<br>5,500 <sup>*</sup> ;<br>134,000 <sup>#</sup> | 9,800;<br>9,500 <sup>*</sup> ;<br>82,000 <sup>#</sup> | male                      | Glenn & Miller 1980; McLellan & Hovey 2001; Pasitschniak-Arts 1993; Pearson 1972 |
| Dasyuromorphia  |                                       |                         |              |                                                         |                                                       |                           |                                                                                  |
| Dasyuridae      | <i>Phascogale tapoatafa</i>           | brush-tailed phascogale | monogamy     | 5,800;<br>4,500 <sup>*</sup>                            | 1,100; 650 <sup>*</sup>                               | male                      | Nowak 1991; Soderquist & Lill 1995                                               |
| Didelphimorphia |                                       |                         |              |                                                         |                                                       |                           |                                                                                  |
| Didelphidae     | <i>Didelphis virginiana</i>           | Opossum                 | non-monogamy | 1,661 <sup>*</sup>                                      | 1,882 <sup>*</sup>                                    | female                    | Gillette 1980; Nowak 1991                                                        |

Lagomorpha

|             |                              |                    |              |     |    |      |                                               |
|-------------|------------------------------|--------------------|--------------|-----|----|------|-----------------------------------------------|
| Leporidae   | <i>Oryctolagus cuniculus</i> | European rabbit    | non-monogamy | 220 | 80 | male | Nowak 1991; Richardson et al. 2002            |
|             | <i>Sylvilagus floridanus</i> | eastern cottontail | non-monogamy | 54  | 42 | male | Chapman et al. 1980; Chapman & Tretheway 1972 |
| Ochotonidae | <i>Ochotona curzoniae</i>    | plateau pika       | monogamy     | 46  | 15 | male | Dobson et al. 1998                            |

Primates

|                |                           |                  |              |           |             |        |                                |
|----------------|---------------------------|------------------|--------------|-----------|-------------|--------|--------------------------------|
| Cheirogaleidae | <i>Microcebus murinus</i> | grey mouse lemur | non-monogamy | 251*      | 63*         | male   | Radespiel et al. 2003          |
| Hominidae      | <i>Hylobates lar</i>      | gibbon           | monogamy     | 620; 500* | 1400; 1400* | female | Brockelman 1998; Leighton 1987 |

Rodentia

|              |                              |                            |              |                       |                         |                               |                                             |
|--------------|------------------------------|----------------------------|--------------|-----------------------|-------------------------|-------------------------------|---------------------------------------------|
| Castoridae   | <i>Castor canadensis</i>     | beaver                     | monogamy     | 3,490; 1,990*         | 10,150; 6,060*          | female                        | Jenkins & Busher 1979; Sun et al. 2000      |
| Geomyidae    | <i>Thomomys bottae</i>       | Botta's pocket gopher      | non-monogamy | 81; 45*               | 53; 20*                 | male                          | Daly & Patton 1990; Nowak 1991              |
| Heteromyidae | <i>Dipodomys merriami</i>    | Merriam's kangaroo rat     | non-monogamy | 62*; 250 <sup>#</sup> | 50*; 158 <sup>#</sup>   | male                          | Jones 1989; Randall 1993                    |
|              | <i>Dipodomys spectabilis</i> | banner-tailed kangaroo rat | non-monogamy | 75*; 900 <sup>#</sup> | 75*; 2,000 <sup>#</sup> | female or equal between sexes | Jones 1987; Jones et al. 1988; Randall 1993 |
|              | <i>Dipodomys stephensi</i>   | Stephens' kangaroo rat     | non-monogamy | 30                    | 39                      | female                        | Price et al. 1994; Randall 1993             |

|                |                                         |                             |              |                           |                           |                         |                                                                             |
|----------------|-----------------------------------------|-----------------------------|--------------|---------------------------|---------------------------|-------------------------|-----------------------------------------------------------------------------|
| Hydrochoeridae | <i>Hydrochaeris hydrochaeris</i>        | capybara                    | non-monogamy | 4,025*                    | 3,500*                    | male                    | Herrera 1992; Herrera & McDonald 1993                                       |
| Muridae        | <i>Microtus agrestis</i>                | field vole                  | non-monogamy | 59; 159 <sup>#</sup>      | 29; 194 <sup>#</sup>      | male                    | Nowak 1991; Sandell et al. 1990                                             |
|                | <i>Microtus ochrogaster</i>             | prairie vole                | monogamy     | 33; 23*; 136 <sup>#</sup> | 29; 18*; 127 <sup>#</sup> | male                    | McGuire et al. 1993                                                         |
|                | <i>Microtus townsendii</i> <sup>^</sup> | Townsend's vole             | non-monogamy | 19                        | 12                        | male                    | Lambin 1994; Nowak 1991                                                     |
|                | <i>Ondatra zibethicus</i>               | muskrat                     | monogamy     | 65                        | 41                        | male                    | Caley 1987; Errington & Errington 1937; Errington 1944; Willner et al. 1980 |
|                | <i>Peromyscus californicus</i>          | California mouse            | monogamy     | 41*; 450 <sup>#</sup>     | 97*; 791 <sup>#</sup>     | female                  | Ribble 1992                                                                 |
|                | <i>Peromyscus leucopus</i>              | white-footed mouse          | non-monogamy | 102*                      | 57*                       | male                    | Jacquot & Vessey 1995; Keane 1990; Lackey et al. 1985                       |
|                | <i>Peromyscus maniculatus</i>           | deer mouse                  | non-monogamy | 183*; 883 <sup>#</sup>    | 107*; 1005 <sup>#</sup>   | male (based on medians) | Dice & Howard 1951                                                          |
|                | <i>Peromyscus polionotus</i>            | old-field mouse             | monogamy     | 175                       | 141                       | male                    | Swilling & Wooten 2002                                                      |
| Sciuridae      | <i>Cynomys gunnisoni</i>                | Gunnison's prairie dog      | non-monogamy | 198                       | 126                       | male                    | Hoogland 1999                                                               |
|                | <i>Marmota flaviventris</i>             | yellow-bellied marmot       | non-monogamy | 1,825*                    | 350*                      | male                    | Van Vuren 1990                                                              |
|                | <i>Sciurus carolinensis</i>             | eastern grey squirrel       | non-monogamy | 235*                      | 175*                      | male                    | Cordes & Barkalow 1972                                                      |
|                | <i>Tamias striatus</i>                  | eastern chipmunk            | non-monogamy | 345; 174*                 | 85; 25*                   | male                    | Elliott 1978; Loew 1999                                                     |
|                | <i>Tamiasciurus hudsonicus</i>          | North American red squirrel | non-monogamy | 253                       | 301                       | female                  | Larsen & Boutin 1994; Wauters & Dhondt 1993                                 |
|                | <i>Uroditellus columbianus</i>          | Columbian ground squirrel   | non-monogamy | 351*                      | 338*                      | male                    | Hackett 1987 ; Murie & Harris 1984                                          |
|                | <i>Uroditellus parryi</i>               | Arctic ground squirrel      | non-monogamy | 515; 241*                 | 120; 61*                  | male                    | Byrom & Krebs 1999; Nowak 1991                                              |

#: maximum dispersal distance  
\*: median dispersal distance  
^: not included in phylogenetic analysis

Sources:

- Anderson, A.E. & Wallmo, O.C.** 1984. *Odocoileus hemionus*. *Mammalian Species*, **219**, 1-9.
- Andrews, R. D. & Boggess, E. K.** 1978. Ecology of coyotes in Iowa. In: *Coyotes: biology, behavior, and management*. (Ed. by M. Bekoff), pp. 249-265. New York: Academic Press.
- Arthur, S. M., Paragi, T. F., & Krohn, W. B.** 1993. Dispersal of juvenile fishers in Maine. *Journal of Wildlife Management*, **57**, 868-874.
- Ballard, W. B., Ayres, L. A., Krausman, P. R., Reed, D. J., & Fancy, S. G.** 1997. Ecology of wolves in relation to a migratory caribou herd in northwest Alaska. *Wildlife Monographs*, **135**, 5-47.
- Bekoff, M.** 1977. *Canis latrans*. *Mammalian Species*, **79**, 1-9.
- Bowen, W. D.** 1982. Determining age of coyotes, *Canis latrans*, by tooth sections and tooth-wear patterns. *Canadian Field Naturalist*, **96**, 339-341.
- Brockelman, W. Y., Reichard, U., Treesucon, U., & Raemaekers, J. J.** 1998. Dispersal, pair formation and social structure in gibbons (*Hylobates lar*). *Behavioral Ecology and Sociobiology*, **42**, 329-339.
- Bunnell, F. L. & Harstad, A. S.** 1983. Dispersal and dispersion of black-tailed deer: models and observations. *Journal of Mammalogy*, **64**, 201-209.
- Byrom, A. E.** 2002. Dispersal and survival of juvenile feral ferrets *Mustela furo* in New Zealand. *Journal of Applied Ecology*, **39**, 67-78.
- Byrom, A. E. & Krebs, C. J.** 1999. Natal dispersal of juvenile arctic ground squirrels in the boreal forest. *Canadian Journal of Zoology-Revue Canadienne de Zoologie*, **77**, 1048-1059.
- Caley, M. J.** 1987. Dispersal and inbreeding avoidance in muskrats. *Animal Behaviour*, **35**, 1225-1233.
- Chapman, J. A. & Trethewey, D. E. C.** 1972. Movements within a population of introduced eastern cottontail rabbits. *Journal of Wildlife Management*, **36**, 155-158.
- Chapman, J. A., Hockman, J. G., & Ojeda C., M. M.** 1980. *Sylvilagus floridanus*. *Mammalian Species*, **136**, 1-8.

- Cordes, C. L. & Barkalow, F. S. Jr.** 1972. Home range and dispersal in a North Carolina gray squirrel population. *Proceedings of the Southeastern Association of Game and Fish Commissioners*, **26**, 124-135.
- Currier, M. J. P.** 1983. *Felis concolor*. *Mammalian Species*, 200, 1-7.
- Daly, J. C. & Patton, J. L.** 1990. Dispersal, gene flow, and allelic diversity between local populations of *Thomomys bottae* pocket gophers in the coastal ranges of California. *Evolution*, **44**, 1283-1294.
- Dice, L. R., & Howard, W. E.** 1951. Distance of dispersal by prairie deer mice from birthplaces to breeding sites. *Contributions from the Laboratory of Vertebrate Biology*, **50**, 1-15.
- Dobson, F. S., Smith, A. T., & Gao, W. X.** 1998. Social and ecological influences on dispersal and philopatry in the plateau pika (*Ochotona curzoniae*). *Behavioral Ecology*, **9**, 622-635.
- Dusek, G. L., Mackie, R. J., Herriges, J. D., Jr., & Compton, B. B.** 1989. Population ecology of white-tailed deer along the lower Yellowstone River. *Wildlife Monographs*, **104**, 1-68.
- Elliott, L.** 1978. Social behavior and foraging ecology of the eastern chipmunk (*Tamias striatus*) in the Adirondack Mountains. *Smithsonian Contributions to Zoology*, **265**, 1-107.
- Erlinge, S.** 1977. Spacing strategy in stoat *Mustela erminea*. *Oikos*, **28**, 32-42.
- Errington, P. L.** 1944. Additional studies on tagged young muskrats. *Journal of Wildlife Management*, **8**, 300-306.
- Errington, P. L. & Errington, C. S.** 1937. Experimental tagging of young muskrats for purpose of study. *Journal of Wildlife Management*, **1**, 49-61.
- Fritzell, E. K. & Haroldson, K. J.** 1982. *Urocyon cinereoargenteus*. *Mammalian Species*, **189**, 1-8.
- Gehrt, S. D. & Fritzell, E. K.** 1998. Duration of familial bonds and dispersal patterns for raccoons in south Texas. *Journal of Mammalogy*, **79**, 859-872.
- Gese, E. M. & Mech, L. D.** 1991. Dispersal of wolves (*Canis lupus*) in northeastern Minnesota, 1969-1989. *Canadian Journal of Zoology-Revue Canadienne de Zoologie*, **69**, 2946-2955.
- Gillette, L. N.** 1980. Movement patterns of radio-tagged opossums in Wisconsin. *American Midland Naturalist*, **104**, 1-12.
- Glenn, L. P. & Miller, L. H.** 1980. Seasonal movements of an Alaska peninsula brown bear population. In: *Bears: Their Biology and Management : A Selection of Papers from the Fourth International Conference on Bear Research and Management, Kalispell, Montana, USA, February 1977*. (Ed. Martinka, C. J. & MacArthur, K. L.), pp. 307-312, Tonto Basin, AZ: The Bear Biology Association.

- Hackett, D. F. 1987.** Dispersal of yearling Columbian ground squirrels. Ph.D. thesis, University of Alberta.
- Harrison, R. L. 1992.** Dispersal characteristics of juvenile coyotes in Maine. *Journal of Wildlife Management*, **56**, 128-138.
- Herrera, E. A. 1992.** Growth and dispersal of capybaras (*Hydrochaeris hydrochaeris*) in the llanos of Venezuela. *Journal of Zoology*, **228**, 307-316.
- Herrera, E. A. & McDonald, D. W. 1993.** Aggression, dominance, and mating success among capybara males (*Hydrochaeris hydrochaeris*). *Behavioral Ecology*, **4**, 114-119.
- Hoogland, J. L. 1999.** Philopatry, dispersal, and social organization of Gunnison's prairie dogs. *Journal of Mammalogy*, **80**, 243-251.
- Jacquot, J. J. & Vessey, S. H. 1995.** Influence of the natal environment on dispersal of white-footed mice. *Behavioral Ecology and Sociobiology*, **37**, 407-412.
- Jenkins, S.H. & Busher, P. E. 1979.** *Castor canadensis*. *Mammalian Species*, **120**, 1-8.
- Jensen, B. 1973.** Movements of the red fox (*Vulpes vulpes* L.) in Denmark investigated by marking and recovery. *Danish Review of Game Biology*, **8**, 3-20.
- Jones, W. T. 1987.** Dispersal patterns in kangaroo rats (*Dipodomys spectabilis*). In: *Mammalian Dispersal Patterns: The effects of social structure on population genetics*. (Ed. by Chepko-Sade, B. D. & Tang Halpin, Z.), pp. 119-127. Chicago: University of Chicago Press.
- Jones, W. T. 1989.** Dispersal distance and the range of nightly movements in Merriam's kangaroo rat. *Journal of Mammalogy*, **70**, 27-34.
- Jones, W. T., Waser, P. M., Elliott, L. F., Link, N. E., & Bush, B. B. 1988.** Philopatry, dispersal, and habitat saturation in the banner-tailed kangaroo rat, *Dipodomys spectabilis*. *Ecology*, **69**, 1466-1473.
- Keane, B. 1990.** Dispersal and inbreeding avoidance in the white-footed mouse, *Peromyscus leucopus*. *Animal Behaviour*, **40**, 143-152.
- King, C. M. 1983.** *Mustela erminea*. *Mammalian Species*, **195**, 1-8.
- Lackey, J. A., Huckaby, D. G., & Ormiston, B. G. 1985.** *Peromyscus leucopus*. *Mammalian Species*, **247**, 1-10.
- Lambin, X. 1994.** Natal philopatry, competition for resources, and inbreeding avoidance in Townsend's voles (*Microtus townsendii*). *Ecology*, **75**, 224-235.
- Larivière, S. 2001.** *Ursus americanus*. *Mammalian Species*, **647**, 1-11.
- Larivière, S. & Pasitschniak-Arts, M. 1996.** *Vulpes vulpes*. *Mammalian Species*, **537**, 1-11.
- Larsen, K. W. & Boutin, S. 1994.** Movements, survival, and settlement of red squirrel (*Tamiasciurus hudsonicus*) offspring. *Ecology*, **75**, 214-223.

- Leighton, D.R.** 1987. Gibbons: Territoriality and Monogamy. In: *Primate Societies*. (Ed. by Smuts, B. B., Cheney, D. L., Seyfarth, R. M., Wrangham, R. W. & Struhsaker, T. T.). Chicago: University of Chicago Press.
- Lindzey, F. G.** 1978. Movement patterns of badgers in northwestern Utah. *Journal of Wildlife Management*, **42**, 418-422.
- Loew, S. S.** 1999. Sex-biased dispersal in eastern chipmunks, *Tamias striatus*. *Evolutionary Ecology*, **13**, 557-577.
- Long, C. A.** 1973. *Taxidea taxus*. *Mammalian Species*, **26**, 1-4.
- Maehr, D. S., Land, E. D., Shindle, D. B., Bass, O. L., & Hctor, T. S.** 2002. Florida panther dispersal and conservation. *Biological Conservation*, **106**, 187-197.
- McGuire, B., Getz, L. L., Hofmann, J. E., Pizzuto, T., & Frase, B.** 1993. Natal dispersal and philopatry in prairie voles (*Microtus ochrogaster*) in relation to population density, season, and natal social environment. *Behavioral Ecology and Sociobiology*, **32**, 293-302.
- McLellan, B. N. & Hovey, F. W.** 2001. Natal dispersal of grizzly bears. *Canadian Journal of Zoology-Revue Canadienne de Zoologie*, **79**, 838-844.
- McNutt, J. W.** 1996. Sex-biased dispersal in African wild dogs, *Lycaon pictus*. *Animal Behaviour*, **52**, 1067-1077.
- Messick, J. P. & Hornocker, M. G.** 1981. Ecology of the badger in southwestern Idaho. *Wildlife Monographs*, **76**, 3-53.
- Mitchell, J. L.** 1961. Mink movements and populations on a Montana river. *Journal of Wildlife Management*, **25**, 48-54.
- Murie, J. O. & Harris, M. A.** 1984. The history of individuals in a population of Columbian ground squirrels: source, settlement, and site attachment. In: *The Biology of Ground-Dwelling Squirrels: Annual Cycles, Behavioral Ecology, and Sociality*. (Ed. by Murie, J. O. & Michener, G.R.). Lincoln: University of Nebraska Press.
- Nowak, R. M.** 1991. *Walker's Mammals of the World*. 5<sup>th</sup> ed. Baltimore: Johns Hopkins University Press.
- Pasitschniak-Arts, M.** 1993. *Ursus arctos*. *Mammalian Species*, **439**, 1-10.
- Pearson, A. M.** 1972. Population characteristics of the northern interior grizzly in the Yukon Territory, Canada. In: *Bears: Their biology and management, Vol. 2. A Selection of Papers from the Second International Conference on Bear Research and Management, Calgary, Alberta, Canada, 6-9 November 1970*. pp. 32-35. Morges: Switzerland: International Union for Conservation of Nature and Natural Resources.
- Price, M. V., Kelly, P. A., & Goldingay, R. L.** 1994. Distances moved by Stephens kangaroo rat (*Dipodomys stephensi merriam*) and implications for conservation. *Journal of Mammalogy*, **75**, 929-939.



- Radespiel, L., Lutermann, H., Schmelting, B., Bruford, M. W., & Zimmerman, E.** 2003. Patterns and dynamics of sex-biased dispersal in a nocturnal primate, the grey mouse lemur, *Microcebus murinus*. *Animal Behaviour*, **65**, 709-719.
- Randall, J. A.** 1993. Behavioral adaptations of desert rodents (Heteromyidae). *Animal Behaviour*, **45**, 263-287.
- Ribble, D. O.** 1992. Dispersal in a monogamous rodent, *Peromyscus californicus*. *Ecology*, **73**, 859-866.
- Richardson, B. J., Hayes, R. A., Wheeler, S. H., & Yardin, M. R.** 2002. Social structures, genetic structures and dispersal strategies in Australian rabbit (*Oryctolagus cuniculus*) populations. *Behavioral Ecology and Sociobiology*, **51**, 113-121.
- Rogers, L. L.** 1987. Factors influencing dispersal in the black bear. In: *Mammalian Dispersal Patterns: The effects of social structure on population genetics*. (Ed. by Chepko-Sade, B. D. & Tang Halpin, Z.), pp. 75-84. Chicago: University of Chicago Press.
- Rood, J. P.** 1987. Dispersal and intergroup transfer in the dwarf mongoose. In: *Mammalian Dispersal Patterns: The effects of social structure on population genetics*. (Ed. by Chepko-Sade, B. D. & Tang Halpin, Z.), pp. 85-103. Chicago: University of Chicago Press.
- Rosatte, R. C. & Gunson, J. R.** 1984. Dispersal and home ranges of striped skunks, *Mephitis mephitis*, in an area of population reduction in southern Alberta. *Canadian Field Naturalist*, **98**, 315-319.
- Roy, L. D. & Dorrance, M. J.** 1985. Coyote movements, habitat use, and vulnerability in central Alberta. *Journal of Wildlife Management*, **49**, 307-313.
- Sandell, M., Agrell, J., Erlinge, S., & Nelson, J.** 1990. Natal dispersal in relation to population density and sex ratio in the field vole, *Microtus agrestis*. *Oecologia*, **83**, 145-149.
- Schmidt, K.** 1998. Maternal behaviour and juvenile dispersal in the Eurasian lynx. *Acta Theriologica*, **43**, 391-408.
- Soderquist, T. R. & Lill, A.** 1995. Natal dispersal and philopatry in the carnivorous marsupial *Phascogale tapoatafa* (Dasyuridae). *Ethology*, **99**, 297-312.
- Storm, G. L., Andrews, R. D., Phillips, R. L., Bishop, R. A., Siniff, D. B., & Tester, J. R.** 1976. Morphology, reproduction, dispersal, and mortality of Midwestern red fox populations. *Wildlife Monographs*, **49**, 3-82.
- Stuewer, F. W.** 1943. Reproduction of raccoons in Michigan. *Journal of Wildlife Management*, **7**, 60-73.
- Sun, L. X., Muller-Schwarze, D., & Schulte, B. A.** 2000. Dispersal pattern and effective population size of the beaver. *Canadian Journal of Zoology-Revue Canadienne de Zoologie*, **78**, 393-398.
- Swilling, W. R. & Wooten, M. C.** 2002. Subadult dispersal in a monogamous species: the Alabama beach mouse (*Peromyscus polionotus ammobates*). *Journal of Mammalogy*, **83**, 252-259.

- Tullar, B. F., & Berchielli, L. T.** 1980. Movement of the red fox in central New York. *New York Fish and Game Journal*, **27**, 179-204.
- Tullar, B. F., & Berchielli, L. T.** 1982. Comparison of red foxes and gray foxes in central New York with respect to certain features of behavior, movement, and mortality. *New York Fish and Game Journal*, **29**, 127-133.
- Vangen, K. M., Persson, J., Landa, A., Andersen, R., & Segerstrom, P.** 2001. Characteristics of dispersal in wolverines. *Canadian Journal of Zoology-Revue Canadienne de Zoologie*, **79**, 1641-1649.
- Van Vuren, D.** 1990. Dispersal of yellow-bellied marmots. Ph.D. thesis, University of Kansas.
- Wauters, L., & Dhondt, A. A.** 1993. Immigration pattern and success in red squirrels. *Behavioral Ecology and Sociobiology*, **33**, 159-167.
- Willner, G. R., Feldhamer, G. A., Zucker, E. E., & Chapman, J. A.** 1980. *Ondatra zibethicus*. *Mammalian Species*, **141**, 1-8.
- Wilson, D. E.** 1982. Wolverine. In: *Wild Mammals of North America: Biology, Management, and Economics*. (Ed. by Chapman, J. A. & Feldhamer, G. A.) Baltimore: Johns Hopkins University Press.
