# Supplementary material for: Social Mating System and Sex-Biased Dispersal in Mammals and Birds: A Phylogenetic Analysis
Source: PubMed Central journal article supplement (PMC3590276; doi:10.1371/journal.pone.0057980), 2013-03-06
Supplement: pone.0057980.s002.pdf [file pone.0057980.s002.pdf]

Table S2: mating system and dispersal data for birds.

| taxonomy      | Latin name                     | common name            | mating system | male dispersal distance (m)    | female dispersal distance (m)  | dispersal sex-bias | sources                                          |
|---------------|--------------------------------|------------------------|---------------|--------------------------------|--------------------------------|--------------------|--------------------------------------------------|
| Anseriformes  |                                |                        |               |                                |                                |                    |                                                  |
| Anatidae      | <i>Branta canadensis</i>       | Canada goose           | monogamy      | 15,200                         | 3,100                          | male               | Lessels 1985                                     |
|               | <i>Cygnus olor</i>             | mute swan              | monogamy      | 12,859                         | 7,754                          | male               | Ciaranca et al. 1997; Coleman & Minton 1979      |
| Ciconiiformes |                                |                        |               |                                |                                |                    |                                                  |
| Accipitridae  | <i>Accipiter cooperii</i>      | Cooper's hawk          | monogamy      | 12,000                         | 14,400                         | female             | Curtis et al. 2006; Rosenfield & Bielefeldt 1992 |
|               | <i>Accipiter gentilis</i>      | goshawk                | monogamy      | 27,741                         | 15,588                         | male               | Kenward et al. 1993; Squires & Reynolds 1997     |
|               | <i>Accipiter nisus</i>         | sparrow hawk           | monogamy      | 5,320;<br>14,000*;<br>185,000# | 9,680;<br>27,000*;<br>265,000# | female             | Brown & Amadon 1968; Newton & Marquiss 1983      |
|               | <i>Aquila adalberti</i>        | Spanish imperial eagle | monogamy      | 123,600                        | 140,600                        | female             | Cramp 1980; Ferrer 1993                          |
|               | <i>Circus cyaneus</i>          | hen harrier            | non-monogamy  | 6,300                          | 5,680                          | male               | Picozzi 1984                                     |
|               | <i>Hieraaetus fasciatus</i>    | Bonelli's eagle        | monogamy      | 101,000                        | 189,000                        | female             | Brown & Amadon 1968; Real & Mañosa 2001          |
|               | <i>Milvus milvus</i>           | red kite               | monogamy      | 7,000*                         | 8,000*                         | female             | Newton et al. 1989                               |
| Charadriidae  | <i>Charadrius melodus</i>      | piping plover          | monogamy      | 6,747; 2,525*                  | 7,003; 3,213*                  | female             | Haig & Oring 1988; Wilcox 1959                   |
|               | <i>Recurvirostra americana</i> | American avocet        | monogamy      | 1,100; 620*                    | 7,300; 6,300*                  | female             | Robinson et al. 1997; Robinson & Oring 1997      |
| Falconidae    | <i>Falco peregrinus</i>        | peregrine falcon       | monogamy      | 58,000*                        | 83,000*                        | female             | Mearns & Newton 1984; White et al. 2002          |
|               | <i>Falco sparverius</i>        | American kestrel       | monogamy      | 8,280; 4,380*                  | 8,600; 5,060*                  | female             | Miller & Smallwood 1997; Smallwood & Bird 2002   |

|                |                                  |                        |              |                               |                                 |        |                                                              |
|----------------|----------------------------------|------------------------|--------------|-------------------------------|---------------------------------|--------|--------------------------------------------------------------|
| Gaviidae       | <i>Gavia stellata</i>            | red-throated loon      | monogamy     | 2,170                         | 37,790                          | female | Barr et al. 2000; Okill 1992                                 |
| Procellariidae | <i>Calonectris diomedea</i>      | Cory's shearwater      | monogamy     | 36; 8*                        | 155; 375*                       | female | Cramp 1978; Thibault 1993                                    |
|                | <i>Phoebastria immutabilis</i>   | Laysan albatross       | monogamy     | 18; 13*; 51 <sup>#</sup>      | 25; 24*; 43 <sup>#</sup>        | female | Awkerman et al. 2009; Fisher 1971                            |
| Scolopacidae   | <i>Calidris alpina</i>           | dunlin                 | monogamy     | 1,683; 1,250*                 | 2,101; 2,036*                   | female | Jackson, D. B. 1994; Soikkeli 1970; Warnock & Gill 1996      |
|                | <i>Calidris pusilla</i>          | semipalmated sandpiper | monogamy     | 549*                          | 204*                            | male   | Gratto et al. 1985; Hicklin et al. 2010                      |
|                | <i>Limosa limosa</i>             | black-tailed godwit    | monogamy     | 873                           | 1,080                           | female | Groen 1993                                                   |
| Sulidae        | <i>Tringa totanus</i>            | redshank               | monogamy     | 630                           | 2,200                           | female | Jackson, D. B. 1994                                          |
|                | <i>Sula nebowxii</i>             | blue-footed booby      | monogamy     | 33; 24*                       | 41; 28*                         | female | Nelson 1978; Osorio-Beristain & Drummond 1993                |
| Galliformes    |                                  |                        |              |                               |                                 |        |                                                              |
| Phasianidae    | <i>Bonasa umbellus</i>           | ruffed grouse          | non-monogamy | 2,140                         | 4,820                           | female | Rusch et al. 2000; Small & Rusch 1989                        |
|                | <i>Centrocercus urophasianus</i> | sage grouse            | non-monogamy | 7,400*                        | 8,800*                          | female | Dunn & Braun 1985; Schroeder et al. 1999                     |
|                | <i>Dendragapus obscurus</i>      | blue grouse            | non-monogamy | 1,100*                        | 2,000*                          | female | Hines 1986; Jamieson & Zwickel 1983; Zwickel & Bendell 2005  |
|                | <i>Lagopus lagopus</i>           | willow ptarmigan       | monogamy     | 1,000*; 4,000 <sup>#</sup>    | 2,900*; 7,500 <sup>#</sup>      | female | Hannon et al. 1998; Martin & Hannon 1987                     |
|                | <i>Lagopus leucurus</i>          | white-tailed ptarmigan | non-monogamy | 1,250*; 7,500 <sup>#</sup>    | 4,000*; 29,000 <sup>#</sup>     | female | Braun et al. 1993; Giesen & Braun 1993                       |
| Gruidae        | <i>Tetrao tetrix</i>             | black grouse           | non-monogamy | 1,500; 800*                   | 8,000; 7,300*                   | female | Caizergues & Ellison 2002; Cramp 1980                        |
|                | <i>Grus canadensis</i>           | Florida sandhill crane | monogamy     | 3,940                         | 11,580                          | female | Nesbitt et al. 2002                                          |
| Passeriformes  |                                  |                        |              |                               |                                 |        |                                                              |
| Certhiidae     | <i>Troglodytes aedon</i>         | house wren             | monogamy     | 608*                          | 674*                            | female | Drilling & Thompson 1988; Johnson 1998                       |
| Cinclidae      | <i>Cinclus cinclus</i>           | Welsh dipper           | monogamy     | 3,090; 3,000*                 | 6,450; 5,000*                   | female | Cramp & Simmons 1988; Tyler et al. 1990                      |
| Corvidae       | <i>Aphelocoma coerulescens</i>   | Florida scrub jay      | monogamy     | 387; 170*; 4,068 <sup>#</sup> | 1,165; 678*; 6,102 <sup>#</sup> | female | Woolfenden & Fitzpatrick 1978; Woolfenden & Fitzpatrick 1996 |
|                | <i>Perisoreus canadensis</i>     | gray jay               | monogamy     | 3                             | 7                               | female | Strickland 1991; Strickland & Ouellet 2011                   |

|              |                                  |                             |              |                                                 |                                                 |                         |                                                     |
|--------------|----------------------------------|-----------------------------|--------------|-------------------------------------------------|-------------------------------------------------|-------------------------|-----------------------------------------------------|
|              | <i>Pica pica</i>                 | magpie                      | monogamy     | 358; 350 <sup>‡</sup> ;<br>1,300 <sup>#</sup>   | 465; 498 <sup>‡</sup> ;<br>800 <sup>#</sup>     | female                  | Birkhead et al. 1986; Eden 1987; Trost 1999         |
| Fringillidae | <i>Dendroica kirtlandii</i>      | Kirtland's warbler          | monogamy     | 5,601                                           | 21,320                                          | female                  | Berger & Radabaugh 1968; Mayfield 1992              |
|              | <i>Emberiza schoeniclus</i>      | reed bunting                | non-monogamy | 1,241; 1,000 <sup>*</sup>                       | 1,864; 1,500 <sup>*</sup>                       | female                  | Cramp et al. 1994; Haukioja, 1971                   |
|              | <i>Melospiza melodia</i>         | song sparrow                | monogamy     | 110 <sup>*</sup>                                | 127 <sup>*</sup>                                | female                  | Arcese 1989                                         |
|              | <i>Passerculus sandwichensis</i> | Savannah sparrow            | non-monogamy | 262; 202 <sup>‡</sup> ;<br>1,381 <sup>#</sup>   | 309; 248 <sup>‡</sup> ;<br>1,540 <sup>#</sup>   | female                  | Wheelwright & Mauck 1998; Wheelwright & Rising 2008 |
|              | <i>Passerina cyanea</i>          | indigo bunting              | monogamy     | 870                                             | 708                                             | male                    | Payne 1991; Payne 2006                              |
|              | <i>Zonotrichia leucophrys</i>    | white-crowned sparrow       | monogamy     | 555; 376 <sup>*</sup>                           | 614; 526 <sup>*</sup>                           | female                  | Baker & Mewaldt 1978; Chilton et al. 1995           |
| Hirundinidae | <i>Hirundo rustica</i>           | barn swallow                | monogamy     | 6,375 <sup>*</sup>                              | 8,125 <sup>*</sup>                              | female                  | Brown & Brown 1999; Shields 1982                    |
| Maluridae    | <i>Malurus pulcherrimus</i>      | blue-breasted fairy wren    | monogamy     | 219                                             | 319                                             | female                  | Rowley & Russell 2002                               |
|              | <i>Malurus splendens</i>         | splendid fairy wren         | monogamy     | 100; 2,400 <sup>#</sup>                         | 200; 2,400 <sup>#</sup>                         | female                  | Russell & Rowley 1993                               |
| Muscicapidae | <i>Ficedula albicollis</i>       | collared flycatcher         | monogamy     | 518                                             | 840                                             | female                  | Cramp & Perrins 1993; Pärt 1990                     |
|              | <i>Ficedula hypoleuca</i>        | pie flycatcher              | monogamy     | 445                                             | 600                                             | female                  | Cramp & Perrins 1993; Potti & Montalvo 1991         |
|              | <i>Saxicola rubetra</i>          | whinchat                    | monogamy     | 500                                             | 500                                             | equal between the sexes | Bastian 1992; Cramp & Simmons 1988                  |
|              | <i>Sialia sialis</i>             | eastern bluebird            | monogamy     | 1,080; 570 <sup>‡</sup> ;<br>8,170 <sup>#</sup> | 1,390; 900 <sup>‡</sup> ;<br>8,690 <sup>#</sup> | female                  | Plissner & Gowaty 1996                              |
| Paridae      | <i>Parus ater</i>                | coal tit                    | monogamy     | 525                                             | 570                                             | female                  | Cramp & Perrins 1993; Dietrich et al. 2003          |
|              | <i>Parus palustris</i>           | marsh tit                   | monogamy     | 1,100 <sup>‡</sup> ;<br>4,600 <sup>#</sup>      | 2,600 <sup>‡</sup> ; 7,300 <sup>#</sup>         | female                  | Cramp & Perrins 1993; Nilsson 1989                  |
| Sittidae     | <i>Sitta europaea</i>            | nuthatch                    | monogamy     | 1,120 <sup>‡</sup> ;<br>6,100 <sup>#</sup>      | 800 <sup>‡</sup> ; 11,300 <sup>#</sup>          | male                    | Matthysen & Schmidt 1987                            |
| Sylviidae    | <i>Chamaea fasciata</i>          | wrentit                     | monogamy     | 373                                             | 368                                             | male                    | Baker et al. 1995; Sibley 2009                      |
|              | <i>Locustella pleskei</i>        | Styan's grasshopper warbler | monogamy     | 68                                              | 74                                              | female                  | Nagata 1993                                         |

|              |                                |                         |              |           |           |        |                                               |
|--------------|--------------------------------|-------------------------|--------------|-----------|-----------|--------|-----------------------------------------------|
|              | <i>Phylloscopus trochilus</i>  | willow warbler          | monogamy     | 893; 760* | 580; 580* | male   | Lawn 1982; Tianinen 1983                      |
| Piciformes   |                                |                         |              |           |           |        |                                               |
| Picidae      | <i>Melanerpes formicivorus</i> | acorn woodpecker        | non-monogamy | 220       | 530       | female | Koenig et al. 1995; Koenig et al. 2000        |
|              | <i>Picoides borealis</i>       | red-cockaded woodpecker | monogamy     | 2089*     | 3689*     | female | Jackson, J. A. 1994; Schiegg et al. 2006      |
| Strigiformes |                                |                         |              |           |           |        |                                               |
| Strigidae    | <i>Aegolius funereus</i>       | boreal owl              | monogamy     | 21,000*   | 88,000*   | female | Hayward & Hayward 1993; Korpimäki et al. 1987 |
|              | <i>Athene cunicularis</i>      | little owl              | monogamy     | 414*      | 1,116*    | female | Millsap & Bear 1997; Poulin et al. 2011       |

#: maximum dispersal distance

\*: median dispersal distance

## Sources:

**Arcese, P.** 1989. Intrasexual competition, mating system and natal dispersal in song sparrows. *Animal Behaviour*, **38**, 958-979.

**Awkerman, J., Anderson, D. & Whittow, G. C.** 2009. Laysan Albatross (*Phoebastria immutabilis*), The Birds of North America Online (A. Poole, Ed.). Ithaca: Cornell Lab of Ornithology; Retrieved from the Birds of North America Online: <http://bna.birds.cornell.edu/bna/species/066>. doi:10.2173/bna.66

**Baker, M., Nur, N. & Geupel, G. R.** 1995. Correcting biased estimates of dispersal and survival due to limited study area: theory and an application using wrentits. *Condor*, **97**, 663-674.

**Baker, M. C. & Mewaldt, L. R.** 1978. Song dialects as barriers to dispersal in White-Crowned Sparrows, *Zonotrichia leucophrys nuttalli*. *Evolution*, **32**, 712-722.

- Barr, J. F., Eberl, C. & McIntyre, J. W.** 2000. Red-throated Loon (*Gavia stellata*), The Birds of North America Online (A. Poole, Ed.). Ithaca: Cornell Lab of Ornithology; Retrieved from the Birds of North America Online: <http://bna.birds.cornell.edu/bna/species/513>. doi:10.2173/bna.513
- Bastian, H. V.** 1992. Breeding and natal dispersal of Whinchats *Saxicola rubetra*. *Ringing and Migration*, **13**, 13-19.
- Berger, A. J. & Radabaugh, B. E.** 1968. Returns of Kirtland's Warblers to the breeding grounds. *Bird-banding*, **39**, 161-186.
- Birkhead, T. R., Eden, S. F., Clarkson, K., Goodburn, S. F., & Pellatt, J.** 1986. Social organization of a population of magpies *Pica pica*. *Ardea*, **74**, 59-68.
- Braun, C. E., Martin, K. & Robb, L. A.** 1993. White-tailed Ptarmigan (*Lagopus leucura*), The Birds of North America Online (A. Poole, Ed.). Ithaca: Cornell Lab of Ornithology; Retrieved from the Birds of North America Online: <http://bna.birds.cornell.edu/bna/species/068>. doi:10.2173/bna.68
- Brown, C. R. and Brown, M. B.** 1999. Barn Swallow (*Hirundo rustica*), The Birds of North America Online (A. Poole, Ed.). Ithaca: Cornell Lab of Ornithology; Retrieved from the Birds of North America Online: <http://bna.birds.cornell.edu/bna/species/452>. doi:10.2173/bna.452
- Brown, L. & Amadon, D.** 1968. Eagles, Hawks, and Falcons of the World, Vol. 2. New York: McGraw-Hill.
- Caizergues, A. & Ellison, L. N.** 2002. Natal dispersal and its consequences in Black Grouse *Tetrao tetrix*. *Ibis*, **144**, 478-487.
- Chilton, G., Baker, M. C., Barrentine, C. D. & Cunningham, M. A.** 1995. White-crowned Sparrow (*Zonotrichia leucophrys*), The Birds of North America Online (A. Poole, Ed.). Ithaca: Cornell Lab of Ornithology; Retrieved from the Birds of North America Online: <http://bna.birds.cornell.edu/bna/species/183>. doi:10.2173/bna.183
- Ciaranca, M. A., Allin, C. C., & Jones, G. S.** 1997. Mute Swan (*Cygnus olor*). The Birds of North America Online. (Ed: Poole, A.). Ithaca: Cornell Lab of Ornithology; Retrieved from the Birds of North America Online: <http://bna.birds.cornell.edu/bna/species/273>. doi:10.2173/bna.273.
- Coleman, A. E. & Minton, C. D.** 1979. Pairing and breeding of Mute Swans in relation to natal area. *Wildfowl*, **30**, 27-30.

- Cramp, S.** 1978. Handbook of the Birds of Europe, the Middle East, and North Africa: The Birds of the Western Palearctic Volume I: Ostrich to Ducks. New York: Oxford University Press.
- Cramp, S.** 1980. Handbook of the Birds of Europe, the Middle East and North Africa: The Birds of the Western Palearctic, Vol. 2: Hawks to Bustards. New York: Oxford University Press.
- Cramp, S. & Perrins, C. M.** 1993. Handbook of the Birds of Europe, the Middle East, and North Africa: The Birds of the Western Palearctic Volume VII: Flycatchers to Shrikes. New York: Oxford University Press.
- Cramp, S., Perrins, C. M., & Brooks, D. J.** 1994. Handbook of the Birds of Europe, the Middle East, and North Africa: The Birds of the Western Palearctic Volume IX: Buntings and New World Warblers. New York: Oxford University Press.
- Cramp, S. & Simmons, K. E. L.** 1988. Handbook of the Birds of Europe, the Middle East and North Africa: The Birds of the Western Palearctic Volume V: Tyrant Flycatchers to Thrushes. New York: Oxford University Press.
- Curtis, O. E., Rosenfield, R. N. & Bielefeldt, J.** 2006. Cooper's Hawk (*Accipiter cooperii*), The Birds of North America Online (A. Poole, Ed.). Ithaca: Cornell Lab of Ornithology; Retrieved from the Birds of North America Online: <http://bna.birds.cornell.edu/bna/species/075>. doi:10.2173/bna.75
- Dietrich, V. C. J., Schmoll, T., Winkel, W., & Lubjuhn, T.** 2003. Survival to first breeding is not sex-specific in the Coal Tit (*Parus ater*). *Journal für Ornithologie*, **144**, 148-156.
- Drilling, N. E. & Thompson, C. F.** 1988. Natal and breeding dispersal in house wrens (*Troglodytes aedon*). *Auk*, **105**, 480-491.
- Dunn, P. O. & Braun, C. E.** 1985. Natal dispersal and lek fidelity of sage grouse. *Auk*, **102**, 621-627.
- Eden, S. F.** 1987. Natal philopatry of the magpie *Pica pica*. *Ibis*, **129**, 477-490.
- Ferrer, M.** 1993. Ontogeny of dispersal distances in young Spanish imperial eagles. *Behavioral Ecology and Sociobiology*, **32**, 259-263.
- Fisher, H. I.** 1971. Experiments on homing in Laysan albatrosses, *Diomedea immutabilis*. *Condor*, **73**, 389-400.

- Giesen, K. M. & Braun, C. E.** 1993. Natal dispersal and recruitment of juvenile white-tailed Ptarmigan in Colorado. *Journal of Wildlife Management*, **57**, 72-77.
- Gratto, C. L., Morrison, R. I. G., & Cooke, F.** 1985. Philopatry, site tenacity, and mate fidelity in the Semipalmated Sandpiper. *Auk*, **102**, 16-24.
- Groen, N. A.** 1993. Breeding site tenacity and natal philopatry in the black-tailed Godwit *Limosa limosa*. *Ardea*, **81**, 107-113.
- Haig, S. M. & Oring, L. W.** 1988. Mate, site, and territory fidelity in piping plovers. *Auk*, **105**, 268-277.
- Hannon, S. J., Eason, P. K. & Martin, K.** 1998. Willow Ptarmigan (*Lagopus lagopus*), The Birds of North America Online (A. Poole, Ed.). Ithaca: Cornell Lab of Ornithology; Retrieved from the Birds of North America Online: <http://bna.birds.cornell.edu/bna/species/369>. doi:10.2173/bna.369
- Haukioja, E.** 1971. Short-distance dispersal in the Reed Bunting *Emberiza schoeniclus*. *Ornis Fennica*, **48**, 45-67.
- Hayward, G. D. & Hayward, P. H.** 1993. Boreal Owl (*Aegolius funereus*), The Birds of North America Online (A. Poole, Ed.). Ithaca: Cornell Lab of Ornithology; Retrieved from the Birds of North America Online: <http://bna.birds.cornell.edu/bna/species/063>. doi:10.2173/bna.63
- Hicklin, P. & Gratto-Trevor, C. L.** 2010. Semipalmated Sandpiper (*Calidris pusilla*), The Birds of North America Online (A. Poole, Ed.). Ithaca: Cornell Lab of Ornithology; Retrieved from the Birds of North America Online: <http://bna.birds.cornell.edu/bna/species/006>. doi:10.2173/bna.6
- Hines, J. E.** 1986. Survival and reproduction of dispersing blue grouse. *Condor*, **88**, 43-49.
- Jackson, D. B.** 1994. Breeding dispersal and site-fidelity in three monogamous wader species in the Western Isles, UK. *Ibis*, **136**, 463-473.
- Jackson, J. A.** 1994. Red-cockaded Woodpecker (*Picoides borealis*), The Birds of North America Online (A. Poole, Ed.). Ithaca: Cornell Lab of Ornithology; Retrieved from the Birds of North America Online: <http://bna.birds.cornell.edu/bna/species/085>. doi:10.2173/bna.85

- Jamieson, I. G. & Zwickel, F. C.** 1983. Dispersal and site fidelity in Blue Grouse. *Canadian Journal of Zoology-Revue Canadienne de Zoologie*, **61**, 570-573.
- Johnson, L. S.** 1998. House Wren (*Troglodytes aedon*), The Birds of North America Online (A. Poole, Ed.). Ithaca: Cornell Lab of Ornithology; Retrieved from the Birds of North America Online: <http://bna.birds.cornell.edu/bna/species/380>. doi:10.2173/bna.380
- Kenward, R. E., Marcström, V., & Karlbom, M.** 1993. Post-nestling behavior in goshawks, *Accipiter gentilis*: II. Sex differences in sociality and nest-switching. *Animal Behaviour*, **46**, 371-378.
- Koenig, W. D., Hooge, P. N., Stanback, M. T., & Haydock, J.** 2000. Natal dispersal in the cooperatively breeding acorn woodpecker. *Condor*, **102**, 492-502.
- Koenig, W. D., Stacey, P. B., Stanback, M. T. & Mumme, R. L.** 1995. Acorn Woodpecker (*Melanerpes formicivorus*), The Birds of North America Online (A. Poole, Ed.). Ithaca: Cornell Lab of Ornithology; Retrieved from the Birds of North America Online: <http://bna.birds.cornell.edu/bna/species/194>. doi:10.2173/bna.194
- Korpimäki, E., Lagerström, M., & Saurola, P.** 1987. Field evidence for nomadism in Tengmalm's owl *Aegolius funereus*. *Ornis Scandinavica*, **18**, 1-4.
- Lawn, M. R.** 1982. Pairing systems and site tenacity of the Willow Warbler *Phylloscopus trochilus* in southern England. *Ornis Scandinavica*, **13**, 193-199.
- Lessells, C. M.** 1985. Natal and breeding dispersal of Canada geese *Branta canadensis*. *Ibis*, **127**, 31-41.
- Martin, K. & Hannon, S. J.** 1987. Natal philopatry and recruitment of willow ptarmigan in north central and northwestern Canada. *Oecologia*, **71**, 518-524.
- Matthysen, E. & Schmidt, K.** 1987. Natal dispersal in the nuthatch. *Ornis Scandinavica*, **18**, 313-316.
- Mayfield, H. F.** 1992. Kirtland's Warbler (*Setophaga kirtlandii*), The Birds of North America Online (A. Poole, Ed.). Ithaca: Cornell Lab of Ornithology; Retrieved from the Birds of North America Online: <http://bna.birds.cornell.edu/bna/species/019>. doi:10.2173/bna.19



- Mearns, R. & Newton, I.** 1984. Turnover and dispersal in a Peregrin *Falco peregrinus* population. *Ibis*, **126**, 347-355.
- Miller, K. E. & Smallwood, J. A.** 1997. Natal dispersal and philopatry of southeastern American Kestrels in Florida. *Wilson Bulletin*, **109**, 226-232.
- Millsap, B. A. & Bear, C.** 1997. Territory fidelity, mate fidelity, and dispersal in an urban population of Florida burrowing owls. *Raptor Research Report*, **9**, 91-98.
- Nagata, H.** 1993. The structure of a local population and dispersal pattern in the Styan's grasshopper warbler, *Locustella pleskei*. *Ecological Research*, **8**, 1-9.
- Nelson, B.** 1978: The Sulidae: Gannets and Boobies. New York: Oxford University Press.
- Nesbitt, S. A., Schwikert, S. T., & Folk, M. J.** 2002. Natal dispersal in Florida sandhill cranes. *Journal of Wildlife Management*, **66**, 349-352.
- Newton, I., Davis, P. E., & Davis, J. E.** 1989. Age of first breeding, dispersal and survival of Red Kites *Milvus milvus* in Wales. *Ibis*, **131**, 16-21.
- Newton, I. & Marquiss, M.** 1983. Dispersal of sparrowhawks between birthplace and breeding place. *Journal of Animal Ecology*, **52**, 463-477.
- Nilsson, J.** 1989. Causes and consequences of natal dispersal in the Marsh Tit, *Parus palustris*. *Journal of Animal Ecology*, **58**, 619-636.
- Okill, J. D.** 1992. Natal dispersal and breeding site fidelity of Red-throated Divers *Gavia stellata* in Shetland. *Ringing and Migration*, **13**, 57-58.
- Osorio-Beristain, M. & Drummond, H.** 1993. Natal dispersal and deferred breeding in the Blue-footed Booby. *Auk*, **110**, 234-239.
- Pärt, T.** 1990. Dispersal in the collared flycatcher: possible causes and reproductive consequences. *Ornis Scandinavica*, **21**, 83-88.

- Payne, R. B.** 2006. Indigo Bunting (*Passerina cyanea*), The Birds of North America Online (A. Poole, Ed.). Ithaca: Cornell Lab of Ornithology; Retrieved from the Birds of North America Online: <http://bna.birds.cornell.edu/bna/species/004>. doi:10.2173/bna.4
- Payne, R. B.** 1991. Natal dispersal and population structure in a migratory songbird, the Indigo Bunting. *Evolution*, **45**, 49-62.
- Picozzi, N.** 1984. Breeding biology of polygynous hen harriers *Circus c. cyaneus* in Orkney. *Ornis Scandinavica*, **15**, 1-10.
- Plissner, J. H. & Gowaty, P. A.** 1996. Patterns of natal dispersal, turnover and dispersal costs in eastern bluebirds. *Animal Behaviour*, **51**, 1307-1322.
- Potti, J. & Montalvo, S.** 1991. Return rate, age at first breeding and natal dispersal of pied flycatchers *Ficedula hypoleuca* in central Spain. *Ardea*, **79**, 419-428.
- Poulin, R., Todd, L. D., Haug, E. A., Millsap, B. A. & Martell, M. S.** 2011. Burrowing Owl (*Athene cunicularia*), The Birds of North America Online (A. Poole, Ed.). Ithaca: Cornell Lab of Ornithology; Retrieved from the Birds of North America Online: <http://bna.birds.cornell.edu/bna/species/061>. doi:10.2173/bna.61
- Real, J. & Mañosa, S.** 2001. Dispersal of juvenile and immature Bonelli's eagles in northeastern Spain. *Journal of Raptor Research*, **35**, 9-14.
- Robinson, J. A. & Oring, L. W.** 1997. Natal and breeding dispersal in American Avocets. *Auk*, **114**, 416-430.
- Robinson, J. A., Oring, L. W., Skorupa, J. P. & Boettcher, R.** 1997. American Avocet (*Recurvirostra americana*), The Birds of North America Online (A. Poole, Ed.). Ithaca: Cornell Lab of Ornithology; Retrieved from the Birds of North America Online: <http://bna.birds.cornell.edu/bna/species/275>. doi:10.2173/bna.275
- Rosenfield, R. N. & Bielefeldt, J.** 1992. Natal dispersal and inbreeding in the Cooper's hawk. *Wilson Bulletin*, **104**, 182-184.
- Rowley, I. & Russell, E.** 2002. A population study of the Blue-breasted Fairy-wren, *Malurus pulcherrimus*, at Dryandra, Western Australia. *Emu*, **102**, 127-135.

- Rusch, D. H., Destefano, S., Reynolds, M. C. & Lauten, D.** 2000. Ruffed Grouse (*Bonasa umbellus*), The Birds of North America Online (A. Poole, Ed.). Ithaca: Cornell Lab of Ornithology; Retrieved from the Birds of North America Online: <http://bna.birds.cornell.edu/bna/species/515>. doi:10.2173/bna.515
- Russell, E. M. & Rowley, I.** 1993. Philopatry or dispersal: competition for territory vacancies in the splendid fairy-wren, *Malurus splendens*. *Animal Behaviour*, **45**, 519-539.
- Schiegg, K., Daniels, S. J., Walters, J. R., Priddy, J. A., & Pasinelli, G.** 2006. Inbreeding in red-cockaded woodpeckers: effects of natal dispersal distance and territory location. *Biological Conservation*, **131**, 544-552.
- Schroeder, M. A., Young, J. R., and Braun, C. E.** 1999. Greater Sage-Grouse (*Centrocercus urophasianus*), The Birds of North America Online (A. Poole, Ed.). Ithaca: Cornell Lab of Ornithology; Retrieved from the Birds of North America Online: <http://bna.birds.cornell.edu/bna/species/425>. doi:10.2173/bna.425
- Shields, W. M.** 1984. Factors affecting nest and site fidelity in Adirondack Bark Swallows (*Hirundo rustica*). *Auk*, **101**, 780-789.
- Sibley, D. A.** 2009. The Sibley Guide to Bird Life and Behavior. New York: Knopf.
- Small, R. J. & Rusch, D. H.** 1989. The natal dispersal of ruffed grouse. *Auk*, **106**, 72-79.
- Smallwood, J. A. & Bird, D. M.** 2002. American Kestrel (*Falco sparverius*), The Birds of North America Online (A. Poole, Ed.). Ithaca: Cornell Lab of Ornithology; Retrieved from the Birds of North America Online: <http://bna.birds.cornell.edu/bna/species/602>. doi:10.2173/bna.602
- Squires, J. R. & Reynolds, R. T.** 1997. Northern Goshawk (*Accipiter gentilis*), The Birds of North America Online (A. Poole, Ed.). Ithaca: Cornell Lab of Ornithology; Retrieved from the Birds of North America Online: <http://bna.birds.cornell.edu/bna/species/298>. doi:10.2173/bna.298
- Soikkeli, M.** 1970. Dispersal of Dunlin *Calidris alpina* in relation to sites of birth and breeding. *Ornis Fennica*, **47**, 1-9.
- Strickland, D. & Ouellet, H.** 2011. Gray Jay (*Perisoreus canadensis*), The Birds of North America Online (A. Poole, Ed.). Ithaca: Cornell Lab of Ornithology; Retrieved from the Birds of North America Online: <http://bna.birds.cornell.edu/bna/species/040>. doi:10.2173/bna.40

- Strickland, D.** 1991. Juvenile dispersal in Gray Jays: dominant brood member expels siblings from natal territory. *Canadian Journal of Zoology-Revue Canadienne de Zoologie*, **69**, 2935-2945.
- Thibault, J.** 1993. Natal philopatry in the Cory's Shearwater (*Calonectris d. diomedea*) on Lavezzi Island, Corsica. *Colonial Waterbirds*, **16**, 77-82.
- Tianinen, J.** 1983. Dynamics of a local population of the willow warbler *Phylloscopus trochilus* in southern Finland. *Ornis Scandinavica*, **14**, 1-15.
- Trost, C. H.** 1999. Black-billed Magpie (*Pica hudsonia*), The Birds of North America Online (A. Poole, Ed.). Ithaca: Cornell Lab of Ornithology; Retrieved from the Birds of North America Online: <http://bna.birds.cornell.edu/bna/species/389>. doi:10.2173/bna.389
- Tyler, S. J., Ormerod, S. J., & Lewis, J. M. S.** 1990. The post-natal and breeding dispersal of Welsh Dippers *Cinclus cinclus*. *Bird Study*, **37**, 18-23.
- Warnock, N. D. & Gill, R. E.** 1996. Dunlin (*Calidris alpina*), The Birds of North America Online (A. Poole, Ed.). Ithaca: Cornell Lab of Ornithology; Retrieved from the Birds of North America Online: <http://bna.birds.cornell.edu/bna/species/203>. doi:10.2173/bna.203
- Wheelwright, N. T. & Mauck, R. A.** 1998. Philopatry, natal dispersal, and inbreeding avoidance in an island population of Savannah Sparrows. *Ecology*, **79**, 755-767.
- Wheelwright, N. T. & Rising, J. D.** 2008. Savannah Sparrow (*Passerculus sandwichensis*), The Birds of North America Online (A. Poole, Ed.). Ithaca: Cornell Lab of Ornithology; Retrieved from the Birds of North America Online: <http://bna.birds.cornell.edu/bna/species/045>. doi:10.2173/bna.45
- White, C. M., Clum, N. J., Cade, T. J. & Hunt, W. G.** 2002. Peregrine Falcon (*Falco peregrinus*), The Birds of North America Online (A. Poole, Ed.). Ithaca: Cornell Lab of Ornithology; Retrieved from the Birds of North America Online: <http://bna.birds.cornell.edu/bna/species/660>. doi:10.2173/bna.660
- Wilcox, L. R.** 1959. A twenty year banding study of the Piping Plover. *Auk*, **76**, 129-152.

**Woolfenden, G. E. & Fitzpatrick, J. W.** 1996. Florida Scrub-Jay (*Aphelocoma coerulescens*), The Birds of North America Online (A. Poole, Ed.). Ithaca: Cornell Lab of Ornithology; Retrieved from the Birds of North America Online: <http://bna.birds.cornell.edu/bna/species/228>. doi:10.2173/bna.228

**Woolfenden, G. E. & Fitzpatrick, J. W.** 1978. The inheritance of territory in group-breeding birds. *BioScience*, **28**, 104-108.

**Zwickel, F. C. & Bendell, J. F.** 2005. Blue Grouse (*Dendragapus obscurus*), The Birds of North America Online (A. Poole, Ed.). Ithaca: Cornell Lab of Ornithology; Retrieved from the Birds of North America Online: <http://bna.birds.cornell.edu/bna/species/015>. doi:10.2173/bna.15
